# Supplementary material for: 1-Dimensional AgVO3 nanowires hybrid with 2-dimensional graphene nanosheets to create 3-dimensional composite aerogels and their improved electrochemical properties
Source: Royal Society of Chemistry journal article supplement (doi:10.1039/c3nr06899d), 2014-01-01
Supplement: c3nr06899d.pdf [file c3nr06899d.pdf]

## Supplementary Information for

# 1-Dimensional AgVO<sub>3</sub> Nanowires Hybrid with 2-Dimensional Graphene Nanosheets to Create 3-Dimensional Composite Aerogels and its Improved Electrochemical Property

Liyang Liang,<sup>b,c</sup> Yimeng Xu,<sup>b</sup> Yong Lei<sup>c,\*</sup> and Haimei Liu<sup>a,b,\*</sup>

<sup>a</sup>College of Environmental and Chemical Engineering, Shanghai University of Electric Power, Shanghai 200090, PR China

<sup>b</sup>State Key Laboratory of Chemical Resource Engineering, Beijing University of Chemical Technology, Beijing 100029, PR China. E-mail: liuhm@mail.buct.edu.cn

<sup>c</sup>Institute for Physics and IMN MacroNano<sup>®</sup> (ZIK), Ilmenau University of Technology, Ilmenau, 98693, Germany. E-mail: yong.lei@tu-ilmenau.de

### Supporting materials include:

#### Part I. Experimental details

##### Preparation

##### Characterization

#### Part II. Supplementary figures

#### Part III References

## Part I. Experimental details

### Preparation

#### Preparation of Graphene Oxide

Graphene Oxide (GO) was synthesized from KS-6 using a modified Hummers method.<sup>1</sup> Briefly, KS-6 (2.0 g) was added to concentrated sulfuric acid (46 mL) under strongly stirring at 0 °C, and then potassium permanganate (6 g) was added slowly to keep the temperature of the suspension lower than 20 °C for 30 min. After this, the reaction system was transferred to a 35 °C water bath with stirring for 2 h, forming a thick paste. Next, 100 mL of water was added slowly to the above solution. Subsequently, the reaction system was transferred to a 95 °C water bath under vigorous agitation for another 15 min. Then, the suspension was diluted by 280 mL of water and treated with 6 mL of H<sub>2</sub>O<sub>2</sub> (30%) to reduce residual permanganate to soluble manganese ions, and the color of solution turned from brown to golden yellow. Finally, the mixture was filtered and washed with 1:10 HCl aqueous solution (1000 mL) to remove metal ions followed by repeated washing with water and centrifugation to remove the acid, and dried in a vacuum oven at 60 °C for 24 h to obtain GO.

#### Preparation of AgVO<sub>3</sub> nanowires/Graphene Composite Aerogels, Pure Graphene Aerogels

AgVO<sub>3</sub> nanowires/Graphene Composite Aerogels were synthesized by using a hydrothermal method assisted by freeze-drying process. Firstly, GO (120 mg) was dispersed in 40 mL of water by sonication to make a GO aqueous dispersion. Next, NH<sub>4</sub>VO<sub>3</sub> (0.46792g) was added to the GO aqueous dispersion and heated at 80 °C to completely dissolve NH<sub>4</sub>VO<sub>3</sub>. At the same time, AgNO<sub>3</sub> (0.67948 g) was dissolved in another 40 mL of water. After this, the GO aqueous dispersion with NH<sub>4</sub>VO<sub>3</sub> was slowly added into the AgNO<sub>3</sub> solution with strongly stirring. Subsequently, the mixture was sealed in a 100 mL Teflon-lined autoclave and hydrothermally treated at 180 °C for 72 h. Finally, the resulting hybrid hydrogels were dialysis for 3 days in deionized water to remove the residual reducing agents, and freeze-dried ( $5 \times 10^{-2}$  mbar at  $T \leq -46$  °C) for 24 h to obtain AgVO<sub>3</sub> nanowires/graphene composite aerogels. For comparison, we have synthesized pure graphene aerogels. Typically, GO (120 mg) was dispersed in 80 mL of water by sonication, reaching a concentration up to 1.5 mg mL<sup>-1</sup>. The resulting brown dispersion was sealed in an autoclave and heated at 180 °C for 72 h. The amount of GO used was 15% of AgVO<sub>3</sub> by weight, which was theoretically fabricated from 0.67948 g AgNO<sub>3</sub>.

## Characterization

The morphology and crystalline structure of the samples was investigated by field emission scanning electron microscopy (FE-SEM, Zeiss Supra 55) and high resolution transmission electron microscopy (HRTEM, JEM-2100F). X-ray diffraction (XRD) patterns were carried on a Shimadzu XRD-6000 diffractometer using Cu-K $\alpha$  radiation ( $\lambda = 0.15406$  nm). Raman spectra were performed with a Renishaw RM2000 confocal Raman spectrometer with a 532 nm excitation laser. X-ray photoelectron spectroscopy (XPS) measurements were conducted using a Thermo Scientific ESCALAB 250 instrument equipped with Mg-K $\alpha$  X-ray source (1253.6 eV) at a pass energy of 30.0 eV. The binding energies obtained in the XPS analysis were calibrated for specimen charging by referencing the C 1s to 284.6 eV. The specific surface areas and the pore-size distributions were obtained at 77 K using the Brunauer-Emmett-Teller (BET) method with a Micromeritics ASAP2020 surface area and porosity analyzer. Before measurements, the samples were degassed at 80 °C for 12 h. The N $_2$  adsorption-desorption isotherm is fitted based on the Brunauer-Emmett-Teller (BET) model. The pore size distribution analysis is determined by the Barrett-Joyner-Halenda (BJH) method.

Electrochemical measurements were investigated using coin-cells with lithium metal as the counter and reference electrode. The working electrode was composed of 70% active materials, 20% acetylene black, and 10% polyvinylidene difluoride (PVDF) binder by weight. The above mixture was pressed onto an aluminum foil which served as a current collector. The electrode was dried at 120 °C in vacuum for 12 h. The electrolyte was 1 M LiPF $_6$  in EC-EMC-DMC (1: 1: 1 volume ratio). The cells were assembled in an argon-filled glove box. Galvanostatic discharge-charge measurements were performed at a potential range of 3.7-1.5 V vs. Li $^+$ /Li using a LAND-CT2001A test system (Wuhan, China) at room temperature. Cyclic voltammetry (CV) was carried out at a scan rate of 0.1 mV s $^{-1}$  using a CHI650D work station (Chenhua, Shanghai). The specific capacity and current density were based on the whole composite material.

## Part II. Supplementary Figures

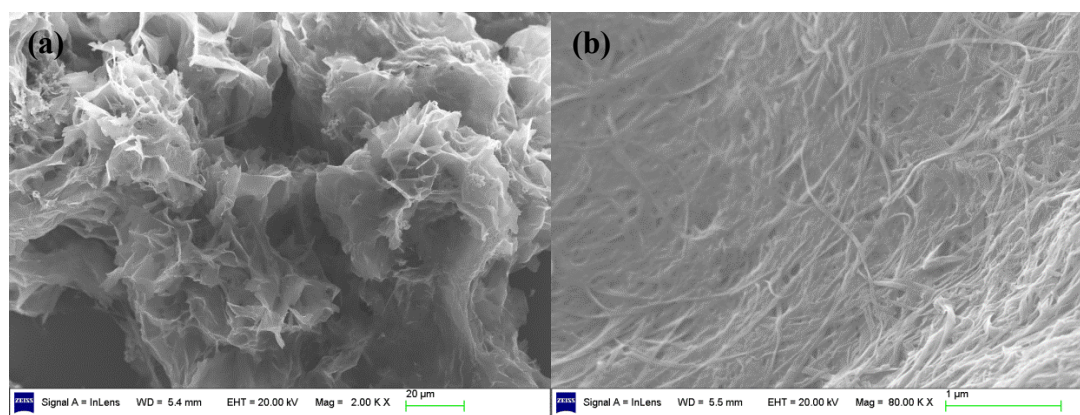

**Fig. S1** SEM images of AgVO<sub>3</sub>/graphene composite hydrogels after hydrothermal self-assembly at 180 °C for 72 h.

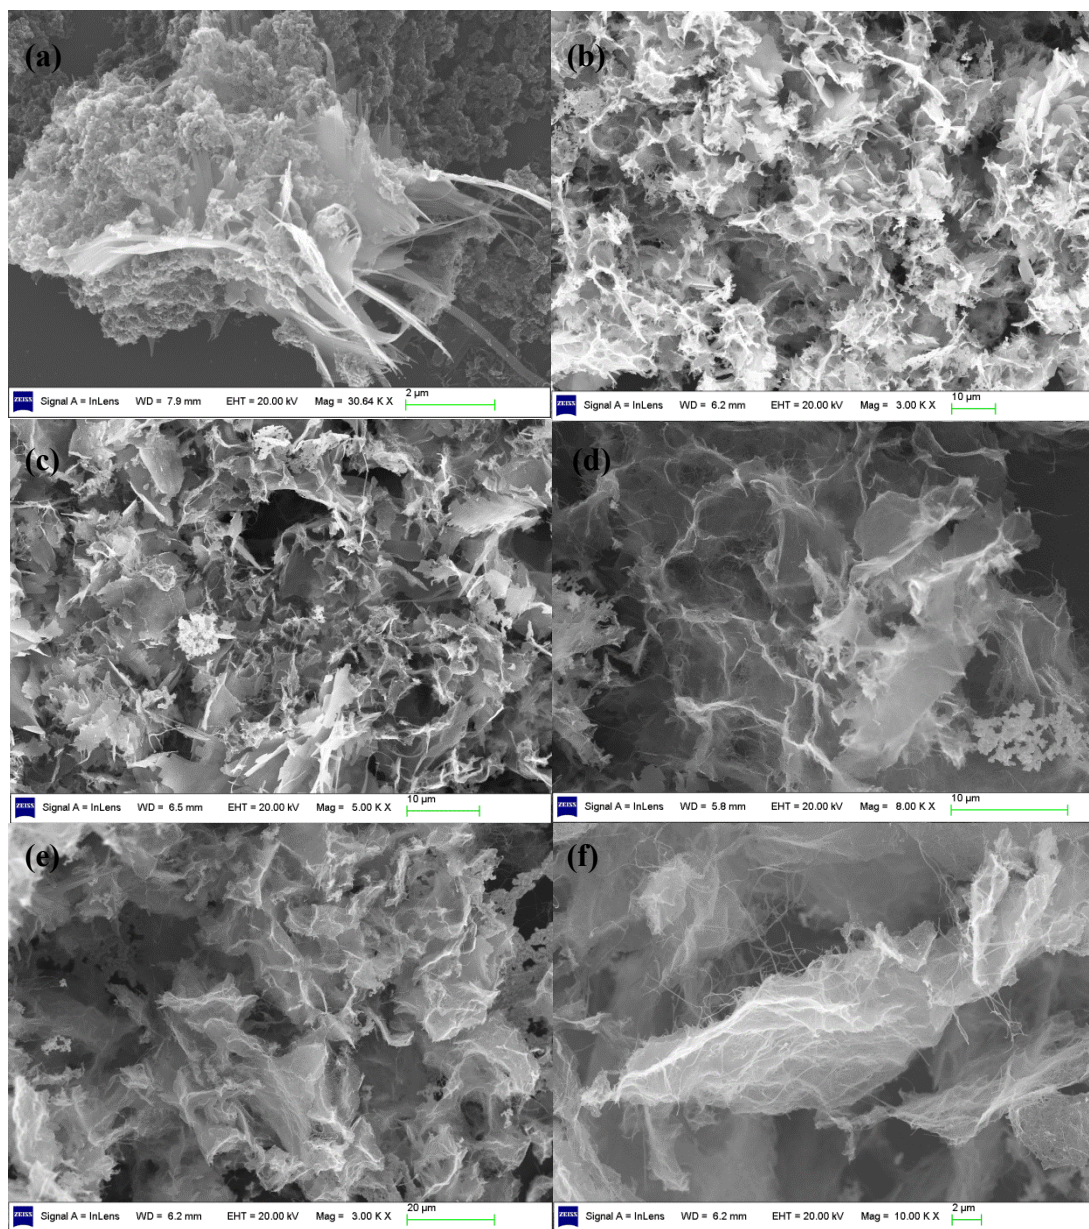

**Fig. S2** SEM images of AgVO<sub>3</sub>/graphene composite aerogels after hydrothermal self-assembly at 180 °C for (a) 12 h, (b) 24 h, (c) 48 h, (d) 72 h, and (e, f) 96 h.



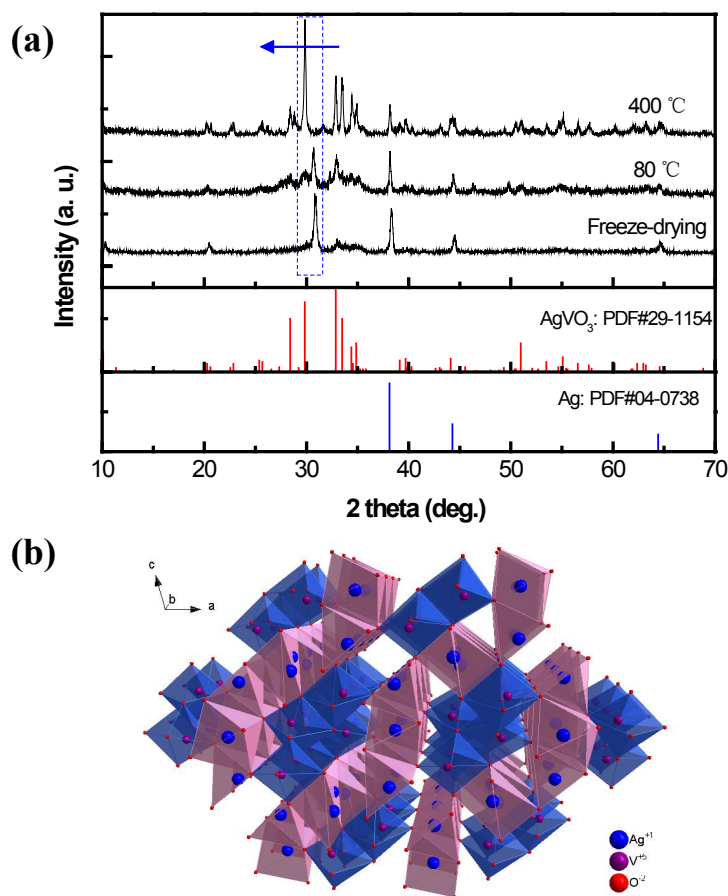

**Fig. S3** (a) XRD patterns of  $\text{AgVO}_3/\text{GAs}$  after freeze-drying,  $80\text{ }^\circ\text{C}$  for 12 h in vacuum, and  $400\text{ }^\circ\text{C}$  for 2 h in air. (b) Crystal structure of  $\beta\text{-AgVO}_3$ .

The structure of  $\text{AgVO}_3/\text{GAs}$  was confirmed by X-ray diffraction (XRD). Fig. S3a displays XRD patterns of  $\text{AgVO}_3/\text{GAs}$  at different post treatment conditions, which are freeze-drying,  $80\text{ }^\circ\text{C}$  for 12 h in vacuum, and  $400\text{ }^\circ\text{C}$  for 2 h in air, respectively. The composite aerogels after freeze-drying consist of part of low crystallinity of  $\text{AgVO}_3$  nanowires and some Ag particles (JCPDS card no. 04-0738), in which these Ag particles were incompletely used to prepare  $\text{AgVO}_3$ . However, with the improved treatment temperatures, the diffraction peaks intensity of Ag particles is gradually weakening, in contrast, the peaks of  $\text{AgVO}_3$  become increasing sharp and intense, and all peaks can be readily indexed to the monoclinic  $\beta\text{-AgVO}_3$  (JCPDS card no. 29-1154). No apparent diffraction peak of graphene is attributed to the small amount (13%) in the composite aerogels. Meanwhile, it is worth

noting that the diffraction peak at  $29.837^\circ$  for JCPDS card no. 29-1154 shifts to larger degree after freeze-drying, due to the decreased distance between the vanadium oxide sheets. With respect to  $\beta$ - $\text{AgVO}_3$  crystal structure (Fig. S3b), the silver interlayer is between the vanadium oxide sheets, and hence the shortage of Ag in silver interlayer of  $\text{AgVO}_3$  leads to the shrunken layer distance after freeze-drying.

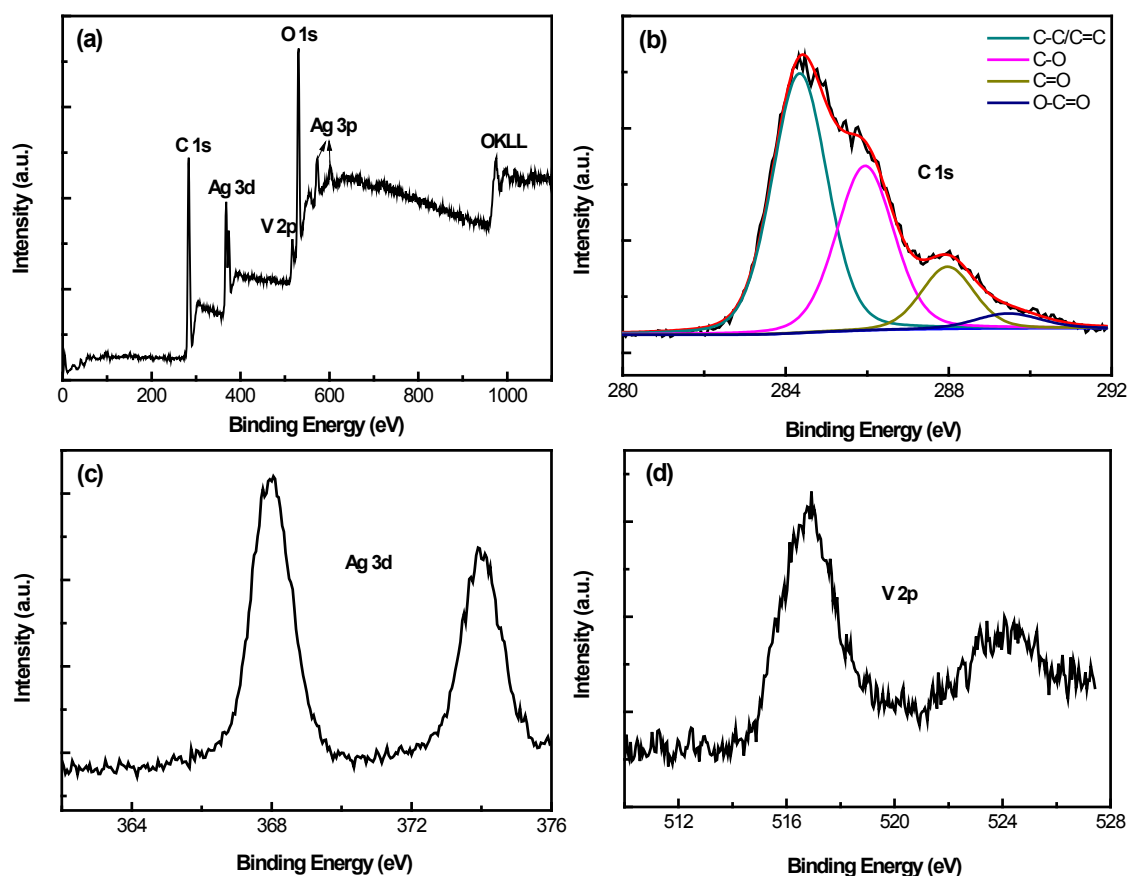

**Fig. S4** (a) XPS survey spectrum of  $\text{AgVO}_3/\text{GAs}$  after freeze-drying. (b), (c), and (d) XPS core level spectra of C 1s, Ag 3d, and V 2p regions.

The chemical attribute of  $\text{AgVO}_3/\text{GAs}$  has been investigated by X-ray photoelectron spectroscopy (XPS) as shown in Fig. S4. No peaks of other elements except C, O, Ag, and V were observed in the survey spectrum (Fig. S4a), indicating the high purity of the composite aerogels. Fig. S4b shows C 1s XPS peaks at 284.34, 285.95, 287.97, and 289.46 eV, corresponding to C=C/C-C in aromatic rings, C-O (epoxy and alkoxy), carbonyl, and carboxyl groups, respectively. The corresponding components of Ag 3d and V 2p can be found in our previous work.<sup>2</sup>



**Table S1 The comparison of electrochemical properties of different SVOs**

| Composition                                                                          | Current density               | Capacity (mAh g <sup>-1</sup> )<br>(cycle number) | Capacity retention<br>(cycle number) |
|--------------------------------------------------------------------------------------|-------------------------------|---------------------------------------------------|--------------------------------------|
| $\beta$ -AgVO <sub>3</sub> nanowires <sup>3</sup>                                    | 0.01 mA                       | 302.1 (1)-90.6 (20)                               | 30% (20)                             |
| Nanocrystalline Ag <sub>2</sub> V <sub>4</sub> O <sub>11</sub> <sup>4</sup>          | 2C                            | 305 (1)-100 (30)                                  | 32.8% (30)                           |
| Ag <sub>2</sub> V <sub>4</sub> O <sub>11</sub> /Ag nanobelts <sup>5</sup>            | 20 mA g <sup>-1</sup>         | 276 (1)-30 (20)                                   | 10.9% (20)                           |
| $\beta$ -Ag <sub>0.33</sub> V <sub>2</sub> O <sub>5</sub> nanoparticles <sup>6</sup> | 100 mA g <sup>-1</sup>        | 175 (1)-125 (30)                                  | 71.4% (30)                           |
| $\beta$ -AgVO <sub>3</sub> nanorods <sup>7</sup>                                     | 100 mA g <sup>-1</sup>        | 228.8 (1)-106 (30)                                | 46.3% (30)                           |
|                                                                                      | 400 mA g <sup>-1</sup>        | 202.7 (1)-65 (30)                                 | 32.1% (30)                           |
| $\beta$ -AgVO <sub>3</sub> /PANI nanowires <sup>8</sup>                              | 30 mA g <sup>-1</sup>         | 211 (1)-131 (20)                                  | 62% (20)                             |
| $\beta$ -AgVO <sub>3</sub> nanowire clusters <sup>9</sup>                            | 100 mA g <sup>-1</sup>        | 220 (1)-96 (50)                                   | 43.6% (50)                           |
|                                                                                      | <b>50 mA g<sup>-1</sup></b>   | <b>195.8 (1)-118.8 (50)</b>                       | <b>60.9% (50)</b>                    |
|                                                                                      | <b>100 mA g<sup>-1</sup></b>  | <b>185 (1)-118.9 (50)</b>                         | <b>62.9% (50)</b>                    |
|                                                                                      | <b>400 mA g<sup>-1</sup></b>  | <b>166.5 (1)-106.4 (50)</b>                       | <b>63.9% (50)</b>                    |
|                                                                                      | <b>800 mA g<sup>-1</sup></b>  | <b>159.1 (1)-106.1 (50)</b>                       | <b>66.7% (50)</b>                    |
| <b>This work</b>                                                                     | <b>1000 mA g<sup>-1</sup></b> | <b>143.9 (1)-116.4 (50)</b>                       | <b>80.9% (50)</b>                    |

## References

- S1 W. S. Hummers and R. E. Offeman, *J. Am. Chem. Soc.*, 1958, **80**, 1339.
- S2 L. Y. Liang, H. M. Liu and W. S. Yang, *Nanoscale*, 2013, **5**, 1026.
- S3 S. Y. Zhang, W. Y. Li, C. S. Li and J. Chen, *J. Phys. Chem. B*, 2006, **110**, 24855.
- S4 F. Sauvage, V. Bodenez, J. M. Tarascon and K. R. Poeppelmeier, *J. Am. Chem. Soc.*, 2010, **132**, 6778.
- S5 Z. J. Chen, S. K. Gao, R. H. Li, M. D. Wei, K. M. Wei and H. S. Zhou, *Electrochim. Acta*, 2008, **53**, 8134.
- S6 Y. Z. Wu, P. N. Zhu, X. Zhao, M. V. Reddy, S. J. Peng, B. V. R. Chowdari and S. Ramakrishna, *J. Mater. Chem. A*, 2013, **1**, 852.
- S7 S. Q. Liang, J. Zhou, A. Q. Pan, X. L. Zhang, Y. Tang, X. P. Tan, T. Chen and R. M. Wu, *J. Power Sources*, 2013, **228**, 178.
- S8 L. Q. Mai, X. Xu, C. H. Han, Y. Z. Luo, L. Xu, Y. A. Wu and Y. L. Zhao, *Nano Lett.*, 2011, **11**, 4992.
- S9 C. H. Han, Y. Q. Pi, Q. Y. An, L. Q. Mai, J. L. Xie, X. Xu, L. Xu, Y. L. Zhao, C. J. Niu, A. M. Khan and X. Y. He, *Nano Lett.*, 2012, **12**, 4668.
